# Supplementary material for: Sensitivity to White Matter fMRI Activation Increases with Field Strength
Source: PubMed Central journal article supplement (PMC3587428; doi:10.1371/journal.pone.0058130), 2013-03-04
Supplement: pone.0058130.s001.pdf [file pone.0058130.s001.pdf]

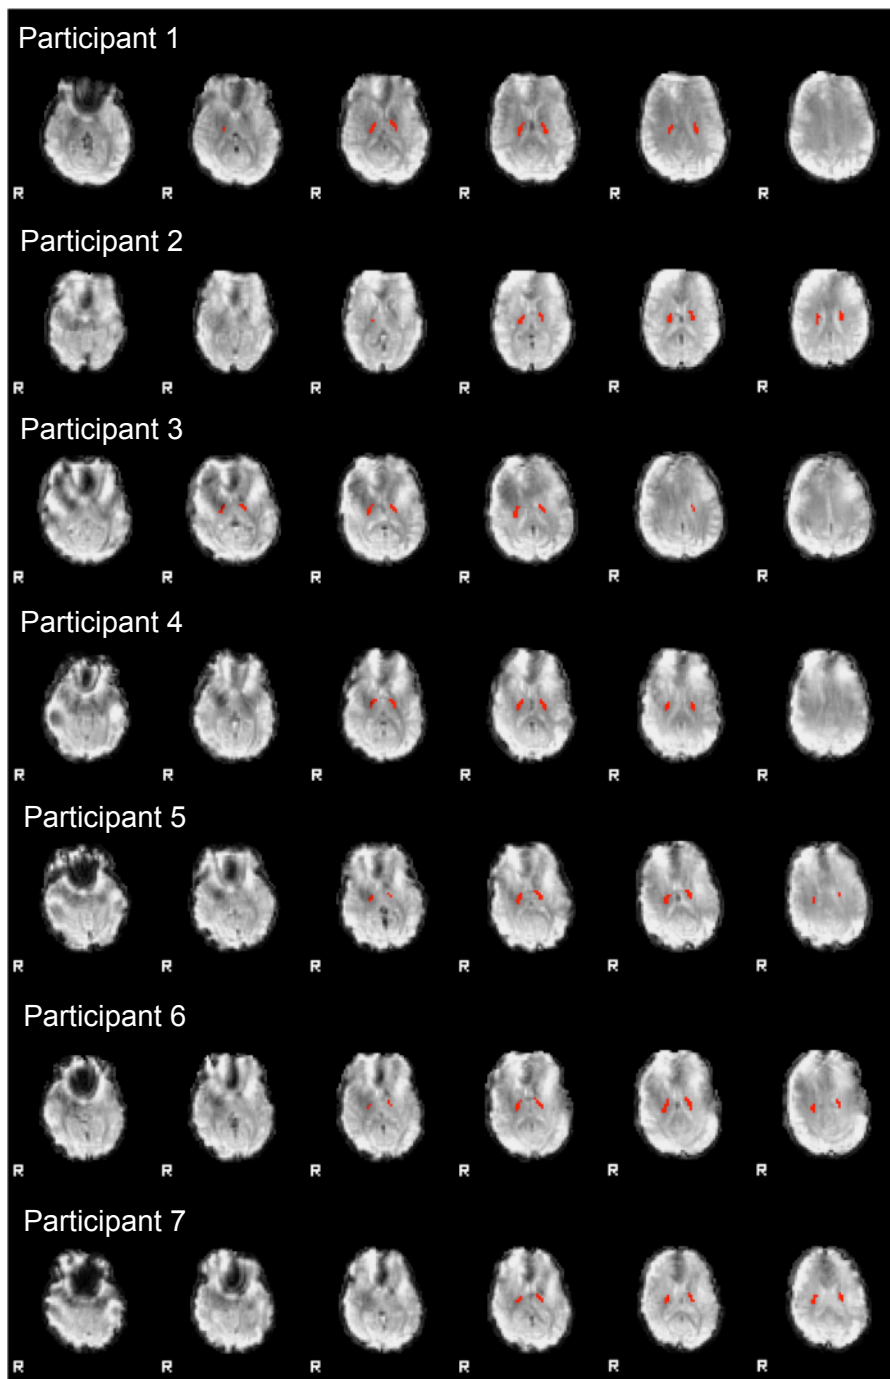

Figure S1. A: PLIC ROI overlaid on a functional volume from each participant (1.5 T data).

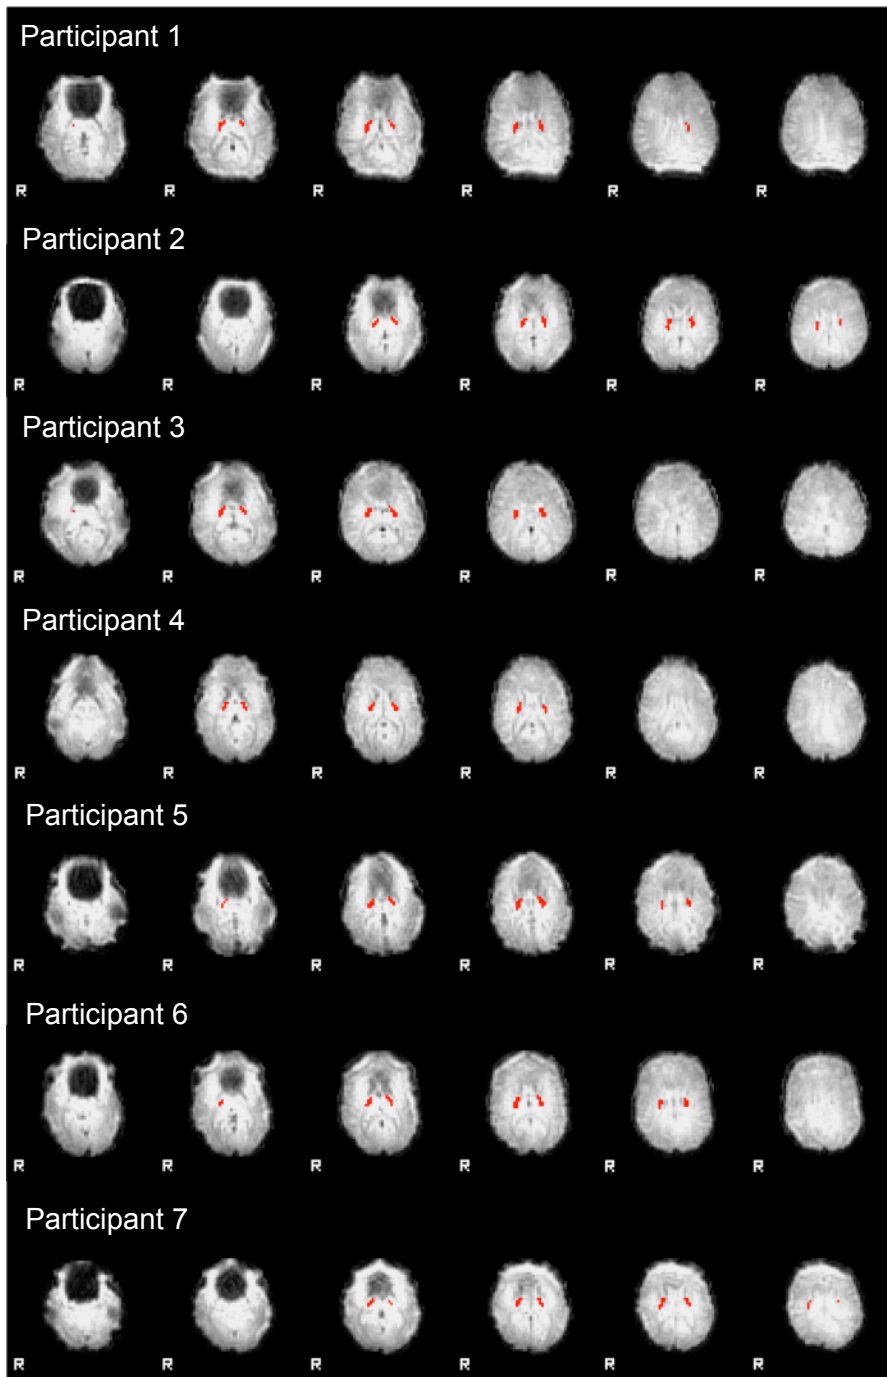

Figure S1. B: PLIC ROI overlaid on a functional volume from each participant (4 T data).
